# Supplementary material for: The genomes of closely related Pantoea ananatis maize seed endophytes having different effects on the host plant differ in secretion system genes and mobile genetic elements
Source: Front Microbiol. 2015 May 12;6:440. doi: 10.3389/fmicb.2015.00440 (PMC4428218; doi:10.3389/fmicb.2015.00440)
Supplement: Supplementary file 6 [file Table6.XLSX]

## Sheet: Table S6
Supplementary Table 6. Functional annotation of proteins encoded by genes specific for P. ananatis strains.
Species	# Locus tag	Domain accession	Description	Gene accession
P. ananatis S6	BN1182_AC_00280	IPR029068	Glyoxalase/Bleomycin resistance protein/Dihydroxybiphenyl dioxygenase	G3DSA:3.10.180.10 (GENE3D)
	BN1182_AE_00850	IPR013781	Glycoside hydrolase, catalytic domain	G3DSA:3.20.20.80 (GENE3D)
	BN1182_AL_00410	IPR000259	Fimbrial-type adhesion domain	G3DSA:2.60.40.1090 (GENE3D)
	BN1182_AS_00900	IPR018723	Protein of unknown function DUF2254, membrane	PF10011 (PFAM)
	BN1182_AV_00440	IPR027417	P-loop containing nucleoside triphosphate hydrolase	G3DSA:3.40.50.300 (GENE3D)
	BN1182_AW_01620	IPR003313	AraC-type arabinose-binding/dimerisation domain	G3DSA:2.60.120.280 (GENE3D)
	BN1182_AW_02590	IPR025949	PapC-like, C-terminal domain	PF13953 (PFAM)
	BN1182_AZ_00510	IPR024478	4HB MCP domain	PF12729 (PFAM)
	BN1182_BG_00660	IPR029058	Alpha/Beta hydrolase fold	G3DSA:3.40.50.1820 (GENE3D)
	BN1182_BH_01030	IPR004810	Formyltetrahydrofolate deformylase	GO:0006189
	BN1182_BH_01500	IPR024744	Putative cyclic diguanylate phosphodiesterase, CSS motif-containing domain	PF12792 (PFAM)
	BN1182_BH_01880	IPR004089	Methyl-accepting chemotaxis protein (MCP) signalling domain	GO:0004871
	BN1182_BH_02000	IPR011991	Winged helix-turn-helix DNA-binding domain	G3DSA:1.10.10.10 (GENE3D)
	BN1182_BL_00100	IPR029022	ABC transporter, BtuC-like	G3DSA:1.10.3470.10 (GENE3D)
	BN1182_BN_00870	IPR016162	Aldehyde dehydrogenase N-terminal domain	G3DSA:3.40.605.10 (GENE3D)
	BN1182_BQ_00430	IPR006311	Twin-arginine translocation pathway, signal sequence	PS51318 (PROSITE_PROFILES)
	BN1182_BQ_01750	IPR029061	Thiamin diphosphate-binding fold	G3DSA:3.40.50.970 (GENE3D)
	BN1182_BV_00070	IPR001036	Acriflavin resistance protein	GO:0005215
	BN1182_BV_00130	IPR013816	ATP-grasp fold, subdomain 2	G3DSA:3.30.470.20 (GENE3D)
	BN1182_BY_00650	IPR020846	Major facilitator superfamily domain	PS50850 (PROSITE_PROFILES)
	BN1182_CD_00940	IPR000014	PAS domain	GO:0004871
	BN1182_CI_00220	IPR000515	ABC transporter type 1, transmembrane domain MetI-like	G3DSA:1.10.3720.10 (GENE3D)
	BN1182_CI_00240	IPR006059	Solute-binding family 1	GO:0005215
	BN1182_CJ_00370	IPR000160	GGDEF domain	PF00990 (PFAM)
	BN1182_CJ_01390	IPR002627	tRNA isopentenyltransferase	GO:0005524
	BN1182_CK_01250	IPR025858	Exopolysaccharide production protein YjbE	PF11106 (PFAM)
	BN1182_CN_00120	IPR001279	Beta-lactamase-like	G3DSA:3.60.15.10 (GENE3D)
	BN1182_CV_00220	IPR003594	Histidine kinase-like ATPase, C-terminal domain	G3DSA:3.30.565.10 (GENE3D)
	BN1182_CV_00250	IPR027477	Succinate dehydrogenase/fumarate reductase flavoprotein, catalytic domain	G3DSA:3.90.700.10 (GENE3D)
	BN1182_DC_00010	IPR012337	Ribonuclease H-like domain	G3DSA:3.30.420.10 (GENE3D)
P. ananatis S7	BN1183_AH_00010	IPR000258	Bacterial ice-nucleation, octamer repeat	GO:0009279
	BN1183_AH_01640	IPR000089	Biotin/lipoyl attachment	PF00364 (PFAM)
	BN1183_AR_01390	IPR009057	Homeodomain-like	G3DSA:1.10.10.60 (GENE3D)
	BN1183_AR_01400	IPR015893	Tetracycline transcriptional regulator, TetR-like, C-terminal	G3DSA:1.10.357.10 (GENE3D)
	BN1183_AT_00110	IPR005119	LysR, substrate-binding	PF03466 (PFAM)
	BN1183_BE_00400	IPR000868	Isochorismatase-like	G3DSA:3.40.50.850 (GENE3D)
	BN1183_BH_00010	IPR013022	Xylose isomerase-like, TIM barrel domain	G3DSA:3.20.20.150 (GENE3D)
	BN1183_BH_00250	IPR007036	Succinylglutamate desuccinylase/aspartoacylase	GO:0008152
	BN1183_BL_00520	IPR018484	Carbohydrate kinase, FGGY, N-terminal	GO:0005975
	BN1183_BM_00010	IPR005017	Membrane protein, aromatic hydrocarbon degradation	PF03349 (PFAM)
	BN1183_BQ_00070	IPR007449	ZipA, C-terminal FtsZ-binding domain	G3DSA:3.30.1400.10 (GENE3D)
	BN1183_BQ_00520	IPR027463	Multidrug efflux transporter AcrB TolC docking domain, DN/DC subdomains	G3DSA:3.30.2090.10 (GENE3D)
	BN1183_BR_00250	IPR029057	Phosphoribosyltransferase-like	G3DSA:3.40.50.2020 (GENE3D)
	BN1183_BS_00010	IPR001674	GMP synthase, C-terminal	GO:0003922
	BN1183_BT_00120	IPR009647	Penicillin-binding, C-terminal	PF06832 (PFAM)
	BN1183_CL_00680	IPR016040	NAD(P)-binding domain	G3DSA:3.40.50.720 (GENE3D)
	BN1183_CU_00150	IPR012336	Thioredoxin-like fold	G3DSA:3.40.30.10 (GENE3D)
P. ananatis S8	BN1184_AP_00430	IPR014729	Rossmann-like alpha/beta/alpha sandwich fold	G3DSA:3.40.50.620 (GENE3D)
	BN1184_AQ_00630	IPR015797	NUDIX hydrolase domain-like	G3DSA:3.90.79.10 (GENE3D)
	BN1184_AV_01290	IPR015421	Pyridoxal phosphate-dependent transferase, major region, subdomain 1	G3DSA:3.40.640.10 (GENE3D)
	BN1184_BB_00010	IPR007451	Uncharacterised protein family UPF0274	G3DSA:1.10.3890.10 (GENE3D)
	BN1184_BE_00310	IPR006842	Transposase (putative), YhgA-like	PF04754 (PFAM)
	BN1184_BE_02550	IPR001926	Tryptophan synthase beta subunit-like PLP-dependent enzyme	PF00291 (PFAM)
	BN1184_BI_00030	IPR002694	Zinc finger, CHC2-type	G3DSA:3.90.580.10 (GENE3D)
	BN1184_BJ_00010	IPR006171	Toprim domain	PF13662 (PFAM)
	BN1184_BL_00410	IPR012348	Ribonucleotide reductase-related	G3DSA:1.10.620.20 (GENE3D)
	BN1184_BV_01150	IPR010771	Intracellular growth attenuator IgaA	GO:0009276
	BN1184_CB_00490	IPR002376	Formyl transferase, N-terminal	G3DSA:3.40.50.170 (GENE3D)
	BN1184_CG_00010	IPR015422	Pyridoxal phosphate-dependent transferase, major region, subdomain 2	G3DSA:3.90.1150.10 (GENE3D)
	BN1184_CH_00560	IPR001626	ABC-3	GO:0005524
	BN1184_CH_00800	IPR001633	EAL domain	G3DSA:3.20.20.450 (GENE3D)
P. ananatis AJ13355	PantAJ13_A_00100	IPR013126	Heat shock protein 70 family	PF00012 (PFAM)
	PantAJ13_A_01180	IPR015813	Pyruvate/Phosphoenolpyruvate kinase-like domain	G3DSA:3.20.20.60 (GENE3D)
	PantAJ13_A_02720	IPR006443	Formate dehydrogenase, alpha subunit, anaerobic	GO:0005737
	PantAJ13_A_02730	IPR006470	Formate dehydrogenase, beta subunit	GO:0008863
	PantAJ13_A_02740	IPR006471	Formate dehydrogenase, gamma subunit	GO:0008863
	PantAJ13_A_04620	IPR027282	Two partner secretion pathway transporter	GO:0015031
	PantAJ13_A_04650	IPR028048	HNH/Endo VII superfamily nuclease toxins	PF15657 (PFAM)
	PantAJ13_A_04740	IPR006914	VENN motif-containing domain	PF04829 (PFAM)
	PantAJ13_A_04760	IPR025948	HTH-like domain	PF13276 (PFAM)
	PantAJ13_A_04960	IPR024749	Putative collagen-binding domain	PF12904 (PFAM)
	PantAJ13_A_05120	IPR016148	Pili assembly chaperone, C-terminal domain	G3DSA:2.60.40.1070 (GENE3D)
	PantAJ13_A_05180	IPR008966	Adhesion domain	SSF49401 (SUPERFAMILY)
	PantAJ13_A_08680	IPR002293	Amino acid/polyamine transporter I	GO:0003333
	PantAJ13_A_08880	IPR010982	Lambda repressor-like, DNA-binding domain	G3DSA:1.10.260.40 (GENE3D)
	PantAJ13_A_08930	IPR011741	Phage conserved hypothetical protein, C-terminal	PF09524 (PFAM)
	PantAJ13_A_08980	IPR003819	Taurine catabolism dioxygenase TauD/TfdA	GO:0016491
	PantAJ13_A_09100	IPR003708	Bacterial protein export chaperone SecB	G3DSA:3.10.420.10 (GENE3D)
	PantAJ13_A_09630	IPR004960	Bacterial lipid A biosynthesis acyltransferase	GO:0009244
	PantAJ13_A_11280	IPR002525	Transposase, IS111A/IS1328/IS1533, N-terminal	GO:0003677
	PantAJ13_A_11320	IPR000802	Arsenical pump membrane protein, ArsB	GO:0015105
	PantAJ13_A_11380	IPR003719	Phenazine biosynthesis PhzF protein	GO:0003824
	PantAJ13_A_11410	IPR016181	Acyl-CoA N-acyltransferase	G3DSA:3.40.630.30 (GENE3D)
	PantAJ13_A_11450	IPR000015	Outer membrane usher protein	GO:0005215
	PantAJ13_A_11530	IPR002201	Glycosyl transferase, family 9	GO:0008152
	PantAJ13_A_11540	IPR012332	P22 tailspike C-terminal domain-like	G3DSA:2.160.20.20 (GENE3D)
	PantAJ13_A_11570	IPR000620	EamA domain	GO:0016020
	PantAJ13_A_11600	IPR007053	LRAT-like domain	PF04970 (PFAM)
	PantAJ13_A_12050	IPR006119	Resolvase, N-terminal	G3DSA:3.40.50.1390 (GENE3D)
	PantAJ13_A_12890	IPR000064	Endopeptidase, NLPC/P60 domain	G3DSA:3.90.1720.10 (GENE3D)
	PantAJ13_A_14280	IPR010352	Protein of unknown function DUF945	PF06097 (PFAM)
	PantAJ13_A_15450	IPR013762	Integrase-like, catalytic core	G3DSA:1.10.443.10 (GENE3D)
	PantAJ13_A_15530	IPR006144	Secretion protein HlyD, conserved site	GO:0008565
	PantAJ13_A_15540	IPR003423	Outer membrane efflux protein	GO:0005215
	PantAJ13_A_16070	IPR007210	ABC-type glycine betaine transport system, substrate-binding domain	GO:0005215
	PantAJ13_A_18270	IPR002656	Acyltransferase 3	GO:0016747
	PantAJ13_A_18570	IPR008824	DNA helicase, Holliday junction RuvB type, N-terminal	GO:0006281
	PantAJ13_A_20920	IPR008773	Phosphonate metabolism protein PhnI	GO:0019634
	PantAJ13_A_20960	IPR028978	Chorismate pyruvate-lyase/UbiC transcription regulator-associated domain	G3DSA:3.40.1410.10 (GENE3D)
	PantAJ13_A_21860	IPR023214	HAD-like domain	G3DSA:3.40.50.1000 (GENE3D)
	PantAJ13_A_21870	IPR029044	Nucleotide-diphospho-sugar transferases	G3DSA:3.90.550.10 (GENE3D)
	PantAJ13_A_21890	IPR013525	ABC-2 type transporter	GO:0016020
	PantAJ13_A_21920	IPR011122	WavE lipopolysaccharide synthesis	PF07507 (PFAM)
	PantAJ13_A_25920	IPR012930	TraC-like	GO:0000746
	PantAJ13_A_25940	IPR023220	Type IV secretion system, VirB5-domain	SSF101082 (SUPERFAMILY)
	PantAJ13_A_25960	IPR007688	Conjugal transfer, TrbL/VirB6	GO:0030255
	PantAJ13_A_25990	IPR010522	Replication protein C, bacterial	PF06504 (PFAM)
	PantAJ13_A_26010	IPR023109	Integrase/recombinase, N-terminal	G3DSA:1.10.150.130 (GENE3D)
	PantAJ13_A_26710	IPR014914	RES	PF08808 (PFAM)
	PantAJ13_A_26740	IPR015801	Copper amine oxidase, N2/N3-terminal	G3DSA:3.10.450.40 (GENE3D)
	PantAJ13_A_26890	IPR025657	RadC-like JAB domain	PF04002 (PFAM)
	PantAJ13_A_26910	IPR009320	YagB/YeeU/YfjZ	PF06154 (PFAM)
	PantAJ13_A_27610	IPR011701	Major facilitator superfamily	GO:0016021
	PantAJ13_A_28770	IPR029065	Enolase C-terminal domain-like	G3DSA:3.20.20.120 (GENE3D)
	PantAJ13_A_29000	IPR002508	Cell wall hydrolase/autolysin, catalytic	G3DSA:3.40.630.40 (GENE3D)
	PantAJ13_A_30060	IPR003317	Cytochrome d ubiquinol oxidase, subunit II	GO:0016020
	PantAJ13_A_30700	IPR022213	Protein of unknown function DUF3742	PF12553 (PFAM)
	PantAJ13_A_30940	IPR001126	DNA-repair protein, UmuC-like	GO:0003684
	PantAJ13_A_31050	IPR005122	Uracil-DNA glycosylase-like	G3DSA:3.40.470.10 (GENE3D)
	PantAJ13_A_32520	IPR011083	Phage tail collar domain	G3DSA:3.90.1340.10 (GENE3D)
	PantAJ13_A_38380	IPR001932	Protein phosphatase 2C (PP2C)-like domain	G3DSA:3.60.40.10 (GENE3D)
	PantAJ13_A_38390	IPR000719	Protein kinase domain	GO:0004672
	PantAJ13_A_38400	IPR012340	Nucleic acid-binding, OB-fold	G3DSA:2.40.50.140 (GENE3D)
	PantAJ13_A_40900	IPR003187	Phospholipase A1	G3DSA:2.40.230.10 (GENE3D)
	PantAJ13_A_41550	IPR013785	Aldolase-type TIM barrel	G3DSA:3.20.20.70 (GENE3D)
	PantAJ13_A_43680	IPR008948	L-Aspartase-like	GO:0003824
	PantAJ13_A_45940	IPR012338	Beta-lactamase/transpeptidase-like	G3DSA:3.40.710.10 (GENE3D)
	PantAJ13_A_46470	IPR023631	Amidase signature domain	G3DSA:3.90.1300.10 (GENE3D)
	PantAJ13_B_02580	IPR007685	RelA/SpoT	GO:0015969
	PantAJ13_B_03100	IPR001046	NRAMP family	GO:0005215
P. ananatis LMG20103	PantLMG20_A_01790	IPR000860	Tetrapyrrole biosynthesis, hydroxymethylbilane synthase	GO:0004418
	PantLMG20_A_05960	IPR025248	Domain of unknown function DUF4007	PF13182 (PFAM)
	PantLMG20_A_06130	IPR029056	Ribokinase-like	G3DSA:3.40.1190.20 (GENE3D)
	PantLMG20_A_06160	IPR029033	Histidine phosphatase superfamily	G3DSA:3.40.50.1240 (GENE3D)
	PantLMG20_A_12070	IPR022385	Rhs repeat-associated core	GO:0097264
	PantLMG20_A_12080	IPR028957	Immunity protein 30	PF15594 (PFAM)
	PantLMG20_A_17450	IPR001447	Arylamine N-acetyltransferase	GO:0008152
	PantLMG20_A_17460	IPR010290	Transmembrane secretion effector	PF05977 (PFAM)
	PantLMG20_A_22220	IPR025985	YnbE-like lipoprotein	PF13617 (PFAM)
	PantLMG20_A_25110	IPR029063	S-adenosyl-L-methionine-dependent methyltransferase	G3DSA:3.40.50.150 (GENE3D)
	PantLMG20_A_27380	IPR001296	Glycosyl transferase, family 1	GO:0009058
	PantLMG20_A_27460	IPR000412	ABC-2 transporter	GO:0006810
	PantLMG20_A_31300	IPR002711	HNH endonuclease	GO:0003676
	PantLMG20_A_32010	IPR007684	Zinc finger, Ogr/Delta-type	PF04606 (PFAM)
	PantLMG20_A_32100	IPR016123	Mog1/PsbP, alpha/beta/alpha sandwich	G3DSA:3.40.1000.10 (GENE3D)
	PantLMG20_A_32200	IPR012334	Pectin lyase fold	G3DSA:2.160.20.10 (GENE3D)
	PantLMG20_A_32240	IPR000390	Small multidrug resistance protein family	GO:0016021
	PantLMG20_A_32250	IPR027299	GIY-YIG domain	G3DSA:3.40.1440.10 (GENE3D)
	PantLMG20_A_34710	IPR014966	FRG domain	PF08867 (PFAM)
	PantLMG20_A_34850	IPR010862	Protein of unknown function DUF1493	PF07377 (PFAM)
	PantLMG20_A_34880	IPR003115	ParB/Sulfiredoxin	PF02195 (PFAM)
	PantLMG20_A_34910	IPR010391	DNA damage-inducible protein DinI-like	G3DSA:3.30.910.10 (GENE3D)
	PantLMG20_A_39110	IPR015955	Lactate dehydrogenase/glycoside hydrolase, family 4, C-terminal	G3DSA:3.90.110.10 (GENE3D)
	PantLMG20_A_43350	IPR010260	Bacteriophage P4, Orf88	PF05930 (PFAM)
	PantLMG20_A_43410	IPR010006	Bacteriophage P4, Psu, polarity suppression protein	PF07455 (PFAM)
	PantLMG20_A_45290	IPR011990	Tetratricopeptide-like helical domain	G3DSA:1.25.40.10 (GENE3D)
P. ananatis LMG5342	PantLMG53_A_07400	IPR029054	dUTPase-like	G3DSA:2.70.40.10 (GENE3D)
	PantLMG53_A_07410	IPR003669	Thymidylate synthase ThyX	GO:0006231
	PantLMG53_A_12290	IPR009329	Protein of unknown function DUF987	PD056719 (PRODOM)
	PantLMG53_A_12320	IPR026325	Protein of unknown function DUF932	PF06067 (PFAM)
	PantLMG53_A_12330	IPR015146	Ribonucleotide reductase, stirrup	GO:0016788
	PantLMG53_A_12370	IPR018356	Transcription regulator, HTH DeoR-type, conserved site	GO:0003700
	PantLMG53_A_12400	IPR000055	Restriction endonuclease, type I, HsdS	GO:0003677
	PantLMG53_A_12460	IPR025048	Protein of unknown function DUF3987)	PF13148 (PFAM)
	PantLMG53_A_12490	IPR021723	Inovirus Gp2	PF11726 (PFAM)
	PantLMG53_A_12510	IPR013467	Conserved hypothetical protein CHP02646	TIGR02646 (TIGRFAM)
	PantLMG53_A_16100	IPR011856	tRNA endonuclease-like domain	G3DSA:3.40.1350.10 (GENE3D)
	PantLMG53_A_16200	IPR025320	Protein of unknown function DUF4225	PF13988 (PFAM)
	PantLMG53_A_16250	IPR005094	Endonuclease relaxase, MobA/VirD2	PF03432 (PFAM)
	PantLMG53_A_16270	IPR020683	Ankyrin repeat-containing domain	G3DSA:1.25.40.20 (GENE3D)
	PantLMG53_A_16940	IPR013328	Dehydrogenase, multihelical	G3DSA:1.10.1040.10 (GENE3D)
	PantLMG53_A_17320	IPR014710	RmlC-like jelly roll fold	G3DSA:2.60.120.10 (GENE3D)
	PantLMG53_A_17340	IPR002797	Polysaccharide biosynthesis protein	GO:0000271
	PantLMG53_A_18730	IPR002477	Peptidoglycan binding-like	G3DSA:1.10.101.10 (GENE3D)
	PantLMG53_A_18760	IPR009739	Protein of unknown function DUF1311	PF07007 (PFAM)
	PantLMG53_A_19790	IPR017849	Alkaline phosphatase-like, alpha/beta/alpha	G3DSA:3.40.720.10 (GENE3D)
	PantLMG53_A_20590	IPR027455	Spermine/spermidine acetyltransferase, N-terminal domain	G3DSA:1.10.287.900 (GENE3D)
	PantLMG53_A_20960	IPR003458	Bacteriophage T4, Gp38, tail fibre assembly	PF02413 (PFAM)
	PantLMG53_A_21640	IPR006498	Bacteriophage P2, FII, major tail tube protein	PF04985 (PFAM)
	PantLMG53_A_21660	IPR004027	SEC-C motif	PF02810 (PFAM)
	PantLMG53_A_21690	IPR010744	Bacteriophage CI repressor	GO:0003677
	PantLMG53_A_27830	IPR029052	Metallo-dependent phosphatase-like	G3DSA:3.60.21.10 (GENE3D)
	PantLMG53_A_27960	IPR000462	CDP-alcohol phosphatidyltransferase	GO:0008654
	PantLMG53_A_28810	IPR016195	Polymerase/histidinol phosphatase-like	GO:0003824
	PantLMG53_A_28850	IPR000477	Reverse transcriptase domain	PF00078 (PFAM)
	PantLMG53_A_30750	IPR008822	Crossover junction endodeoxyribonuclease, RusA-like	G3DSA:3.30.1330.70 (GENE3D)
	PantLMG53_A_37870	IPR008915	Peptidase M50	GO:0004222
	PantLMG53_A_40300	IPR005502	ADP-ribosylation/Crystallin J1	PF03747 (PFAM)
	PantLMG53_A_40310	IPR022020	Domain of unknown function DUF3601	PF12208 (PFAM)
	PantLMG53_A_40700	IPR028943	EH signature domain	PF15611 (PFAM)
	PantLMG53_A_42710	IPR024684	Transcriptional activator PerC/bacteriophage SfV Orf40	PF06069 (PFAM)
	PantLMG53_A_42870	IPR018760	Protein of unknown function DUF2326	PF10088 (PFAM)
	PantLMG53_A_43160	IPR018841	Protein of unknown function DUF2442	PF10387 (PFAM)
	PantLMG53_B_00620	IPR029035	DHS-like NAD/FAD-binding domain	G3DSA:3.40.50.1220 (GENE3D)
	PantLMG53_B_01590	IPR011251	Luciferase-like domain	G3DSA:3.20.20.30 (GENE3D)
	PantLMG53_B_01980	IPR011006	CheY-like superfamily	SSF52172 (SUPERFAMILY)
	PantLMG53_B_01990	IPR000845	Nucleoside phosphorylase domain	G3DSA:3.40.50.1580 (GENE3D)
P. ananatis PA13	PantPA13_B_07500	IPR003488	DNA recombination-mediator protein A	GO:0009294
	PantPA13_B_12780	IPR006674	HD domain	G3DSA:1.10.3210.10 (GENE3D)
	PantPA13_B_12790	IPR005493	Ribonuclease E inhibitor RraA/Dimethylmenaquinone methyltransferase	G3DSA:3.50.30.40 (GENE3D)
	PantPA13_B_12800	IPR001898	Sodium/sulphate symporter	GO:0005215
	PantPA13_B_12840	IPR025166	Domain of unknown function DUF4102	PF13356 (PFAM)
	PantPA13_B_12860	IPR024524	Protein of unknown function DUF3800	PF12686 (PFAM)
	PantPA13_B_17590	IPR006852	Protein of unknown function DUF616	PF04765 (PFAM)
	PantPA13_B_20310	IPR000198	Rho GTPase-activating protein domain	GO:0007165
	PantPA13_B_20540	IPR011325	DNA polymerase III-theta, core, bacterial	G3DSA:1.10.1110.10 (GENE3D)
	PantPA13_B_23290	IPR010774	Protein of unknown function DUF1364	PF07102 (PFAM)
	PantPA13_B_23340	IPR014054	Bacteriophage regulatory protein, Rha family	PF09669 (PFAM)
	PantPA13_B_23370	IPR005335	Terminase small subunit	GO:0006323
	PantPA13_B_27930	IPR020353	Toxin YafO	PD082093 (PRODOM)
	PantPA13_B_27940	IPR006442	Type II toxin-antitoxin system, antitoxin Phd/YefM	PF02604 (PFAM)
	PantPA13_B_27960	IPR009444	Conjugal transfer, TraD, alpha-type	GO:0000746
	PantPA13_B_27980	IPR005053	MobA/MobL protein	PF03389 (PFAM)
	PantPA13_B_28050	IPR000123	RNA-directed DNA polymerase (reverse transcriptase), msDNA	GO:0003723
	PantPA13_B_28090	IPR027454	Histone-like protein H-NS family, oligomerisation domain	G3DSA:1.10.287.1050 (GENE3D)
	PantPA13_B_28180	IPR001830	Glycosyl transferase, family 20	GO:0003824
	PantPA13_B_28490	IPR008979	Galactose-binding domain-like	G3DSA:2.60.120.260 (GENE3D)
	PantPA13_B_28510	IPR003352	Phosphotransferase system, EIIC	GO:0008982
	PantPA13_B_28520	IPR003501	Phosphotransferase system, EIIB component, type 2/3	GO:0008982
	PantPA13_B_28530	IPR003188	Phosphotransferase system, lactose/cellobiose-specific IIA subunit	G3DSA:1.20.58.80 (GENE3D)
	PantPA13_B_28660	IPR029039	Flavoprotein-like	G3DSA:3.40.50.360 (GENE3D)
	PantPA13_B_28950	IPR025075	Protein of unknown function DUF3916	PF13079 (PFAM)
	PantPA13_B_31990	IPR018691	Protein of unknown function DUF2188	PF09954 (PFAM)
	PantPA13_B_32120	IPR003615	HNH nuclease	PF13392 (PFAM)
	PantPA13_B_32880	IPR002934	Nucleotidyl transferase domain	GO:0016779
	PantPA13_B_32890	IPR013099	Two pore domain potassium channel domain	PF07885 (PFAM)
	PantPA13_B_34620	IPR000914	Solute-binding protein family 5	PF00496 (PFAM)
	PantPA13_B_34760	IPR028360	Peptidase S24/S26, beta-ribbon domain	G3DSA:2.10.109.10 (GENE3D)
	PantPA13_B_34790	IPR024429	Endosialidase, N-terminal extension domain	G3DSA:3.30.750.60 (GENE3D)
	PantPA13_B_34810	IPR021283	Protein of unknown function DUF2612	PF11041 (PFAM)
	PantPA13_B_34920	IPR021808	Bacteriophage rv5, Orf53	PF11863 (PFAM)
	PantPA13_B_34960	IPR025127	Protein of unknown function DUF4054	PF13262 (PFAM)
	PantPA13_B_35000	IPR016913	Uncharacterised conserved protein UCP029215	PF09979 (PFAM)
	PantPA13_B_35010	IPR006528	Phage head morphogenesis domain	PF04233 (PFAM)
	PantPA13_B_35020	IPR024459	Protein of unknown function DUF1073	PF06381 (PFAM)
	PantPA13_B_35030	IPR004921	Terminase, large subunit	PF03237 (PFAM)
	PantPA13_B_35040	IPR018738	Protein of unknown function DUF2280	PF10045 (PFAM)
	PantPA13_B_35120	IPR023347	Lysozyme domain	G3DSA:1.10.530.40 (GENE3D)
	PantPA13_B_35160	IPR008713	Bacteriophage lambda NinG	PF05766 (PFAM)
	PantPA13_B_35180	IPR008712	NinF	PF05810 (PFAM)
	PantPA13_B_35200	IPR011681	GcrA cell cycle regulator	PF07750 (PFAM)
	PantPA13_B_35220	IPR009797	Protein of unknown function DUF1367	PF07105 (PFAM)
	PantPA13_B_35290	IPR009731	Replication P	GO:0006270
	PantPA13_B_35300	IPR006497	Bacteriophage lambda, GpO, N-terminal	GO:0006260
	PantPA13_B_35310	IPR018306	Bacteriophage T5, Orf172 DNA-binding	PF10544 (PFAM)
	PantPA13_B_35320	IPR007933	Transcription activator CII	GO:0003677
	PantPA13_B_35390	IPR007539	Domain of unknown function DUF551	PF04448 (PFAM)
	PantPA13_B_35410	IPR013056	Bacteriophage lambda, CIII, regulatory protein	PF02061 (PFAM)
	PantPA13_B_35430	IPR004590	DNA single-strand annealing protein RecT	GO:0003677
	PantPA13_B_35440	IPR008840	Siphovirus Gp157	PF05565 (PFAM)
	PantPA13_B_35540	IPR002052	DNA methylase, N-6 adenine-specific, conserved site	GO:0003676
	PantPA13_B_41040	IPR021225	Protein of unknown function DUF2778	PF10908 (PFAM)
	PantPA13_B_41160	IPR002035	von Willebrand factor, type A	G3DSA:3.40.50.410 (GENE3D)
	PantPA13_B_41180	IPR011009	Protein kinase-like domain	GO:0016772
	PantPA13_B_42780	IPR000760	Inositol monophosphatase	GO:0046854
	PantPA13_B_42810	IPR026045	Ferric binding protein	PIRSF002825 (PIRSF)
	PantPA13_B_43210	IPR029045	ClpP/crotonase-like domain	G3DSA:3.90.226.10 (GENE3D)
	PantPA13_B_43320	IPR001646	Pentapeptide repeat	PF13599 (PFAM)
